# Supplementary material
Source: PubMed Central journal article supplement (PMC6928561)
Supplement: Supplemental_material3.pdf [file Supplemental_material3.pdf]

# Cav-1 KO tMCAO 3d

Ipsilateral to lesion

Contralateral to lesion

CD31

Cav-1

Merge + DAPI

Cav-1 KO

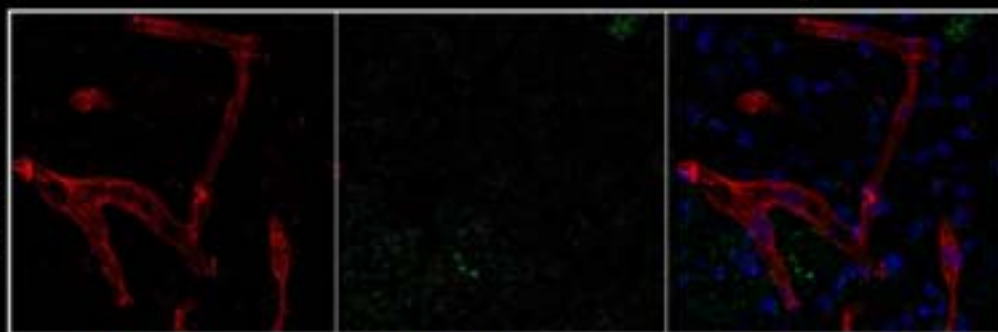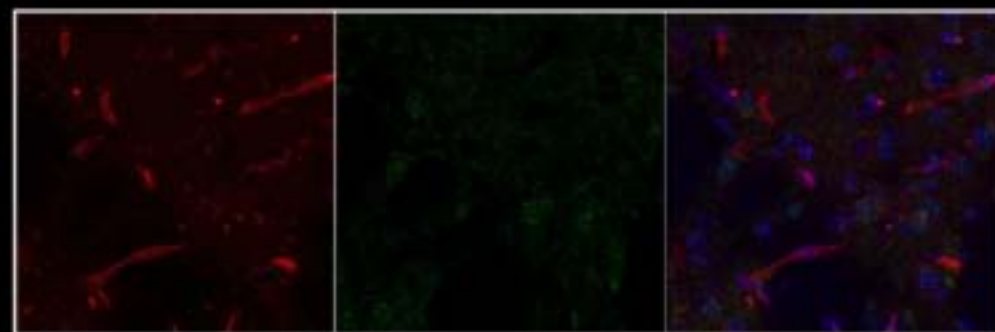

GS

Cav-1

Merge + DAPI

Cav-1 KO

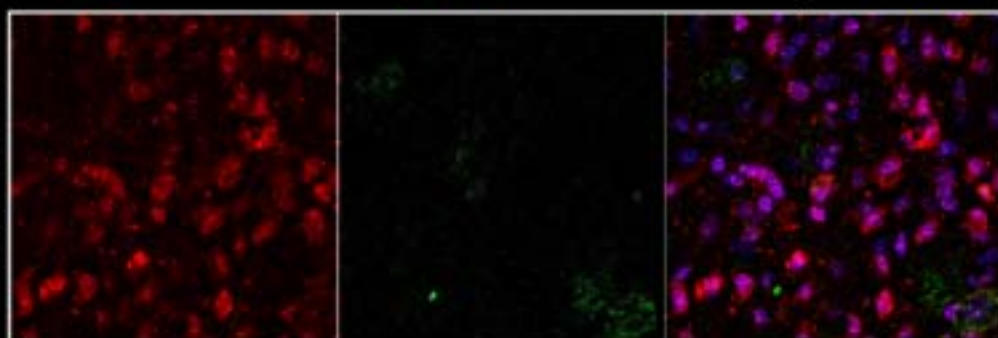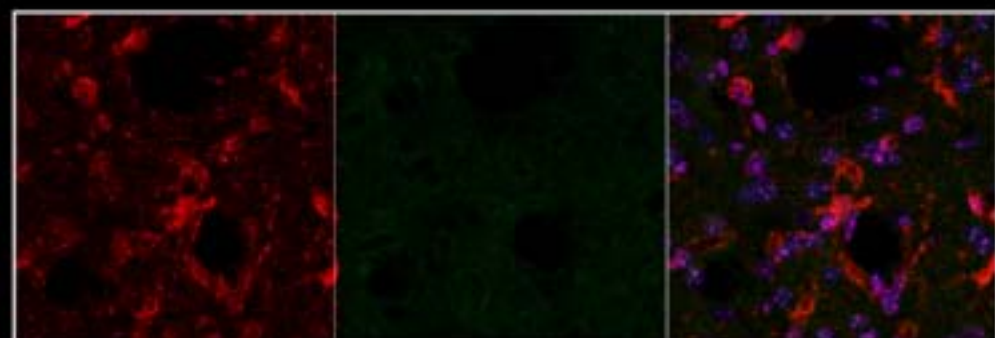

GFAP

Cav-1

Merge + DAPI

Cav-1 KO

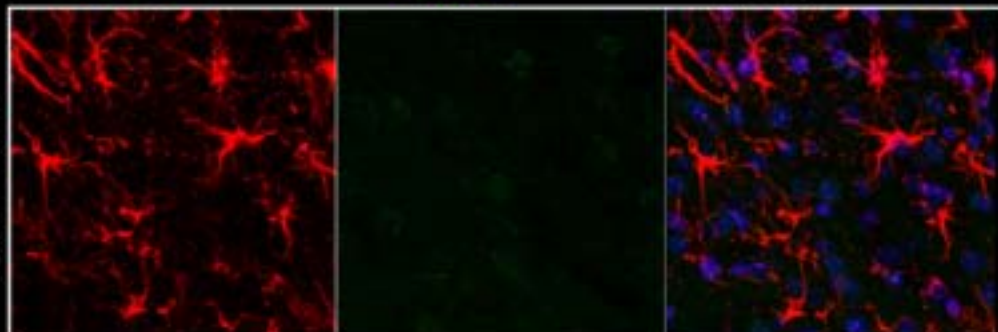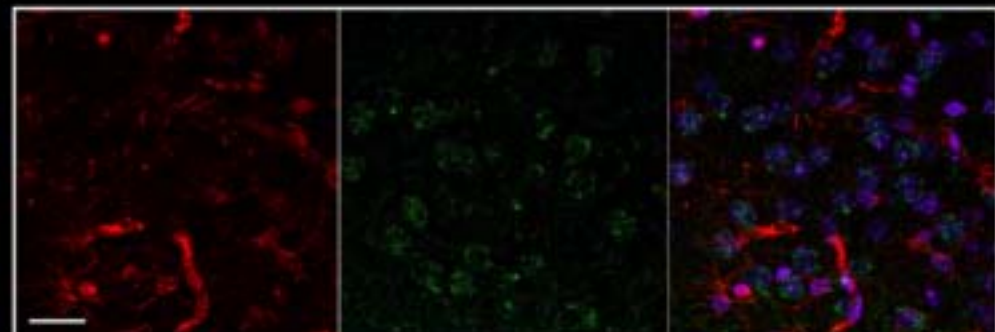

Alexa-568

Alexa-488

Merge + DAPI

Control

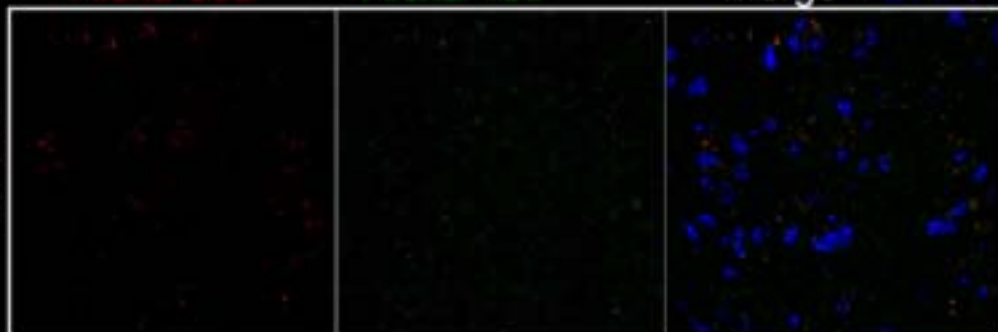

WT: lesion

Cav-1

NeuN

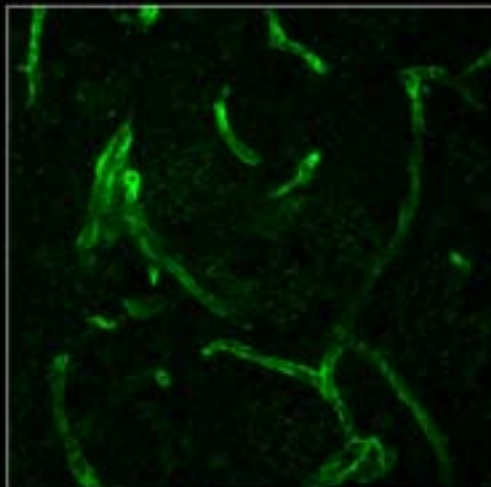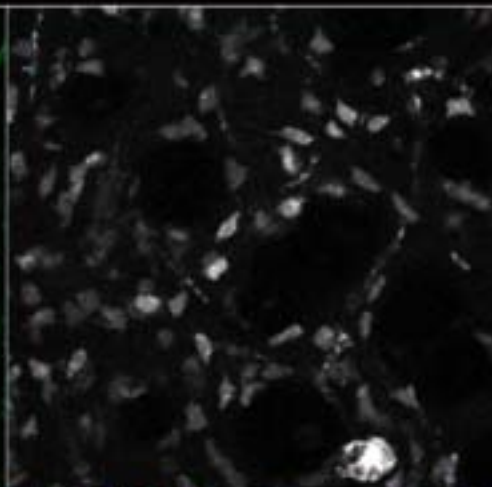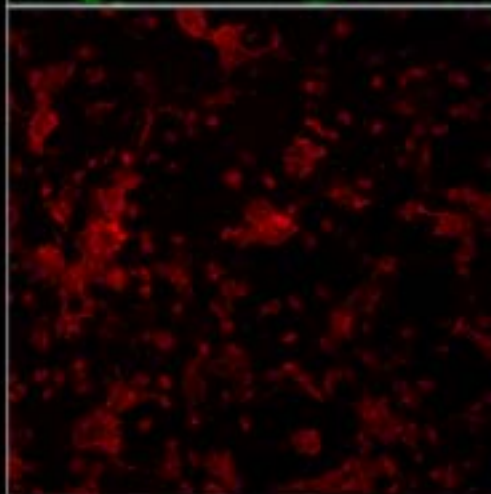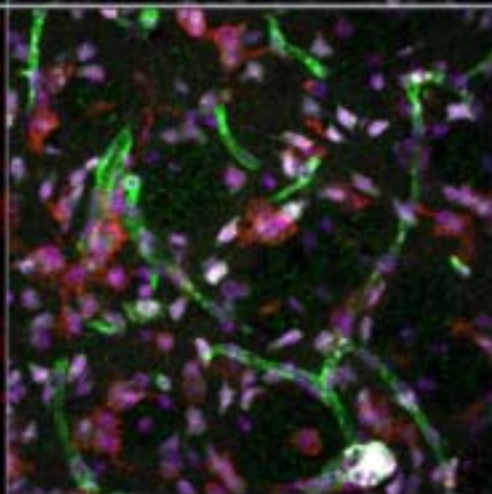

Iba1

Merge + DAPI

WT: peri-lesion

Cav-1

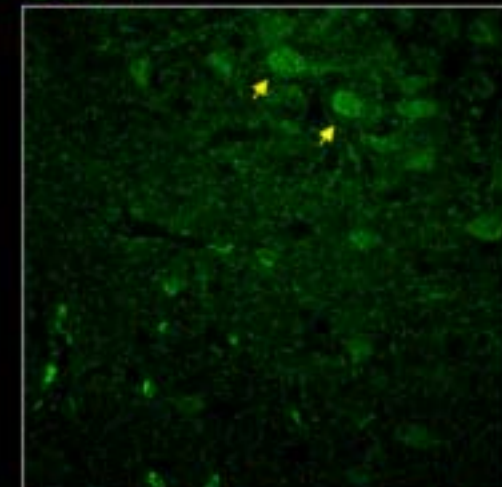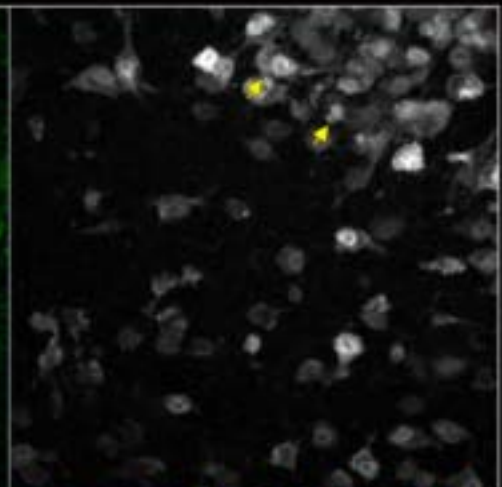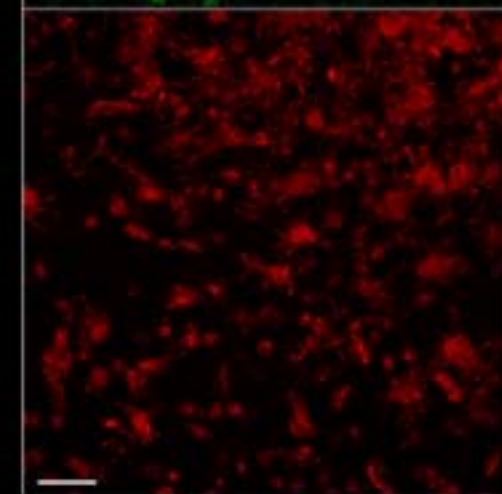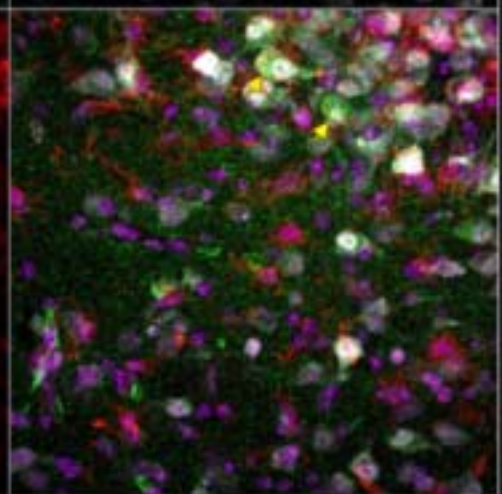

(a) Rotarod: Latency to fall

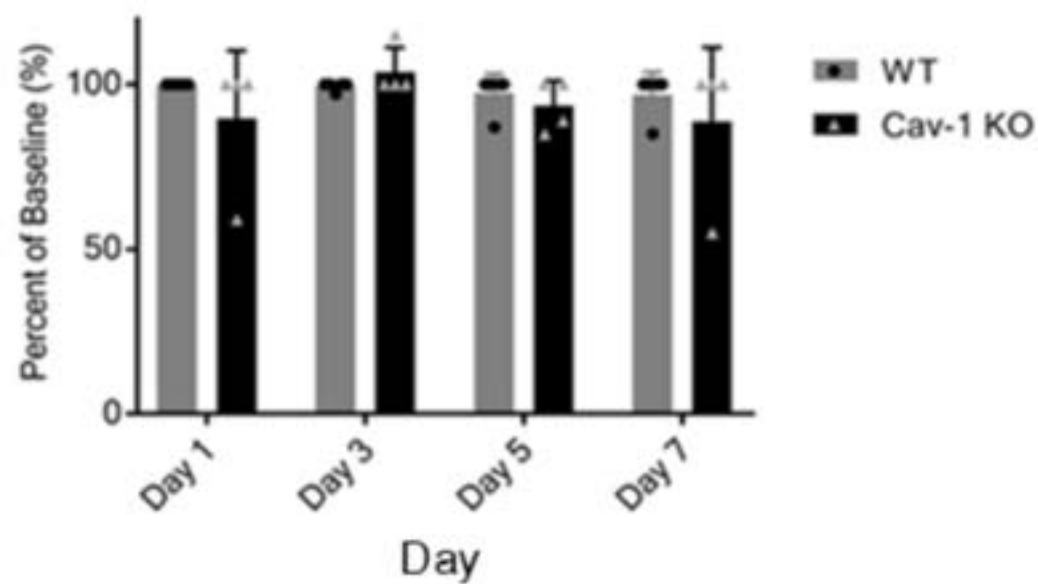

(b) Adhesive Removal: Contact Time - Sham

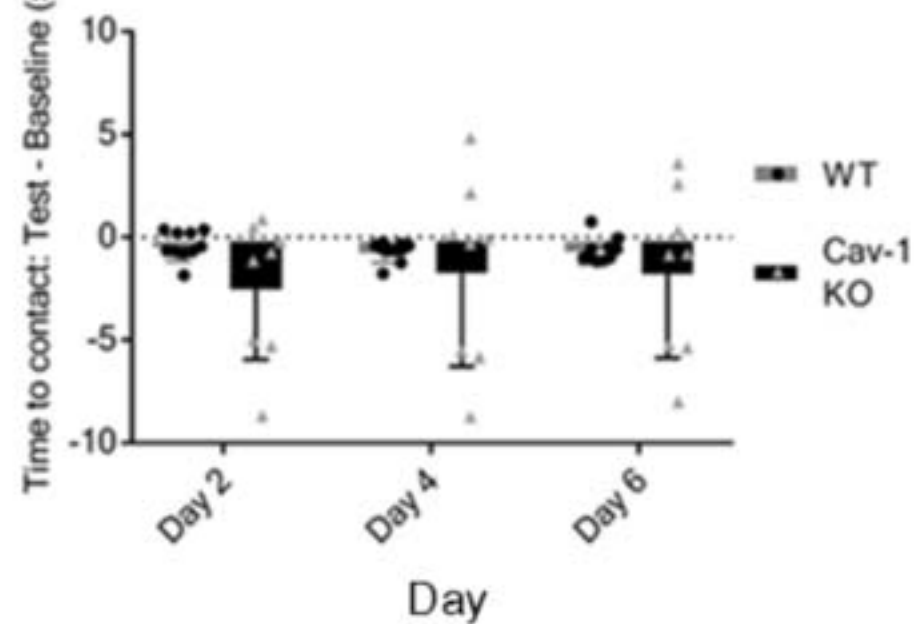

(c) Adhesive Removal: Removal Time - Sham

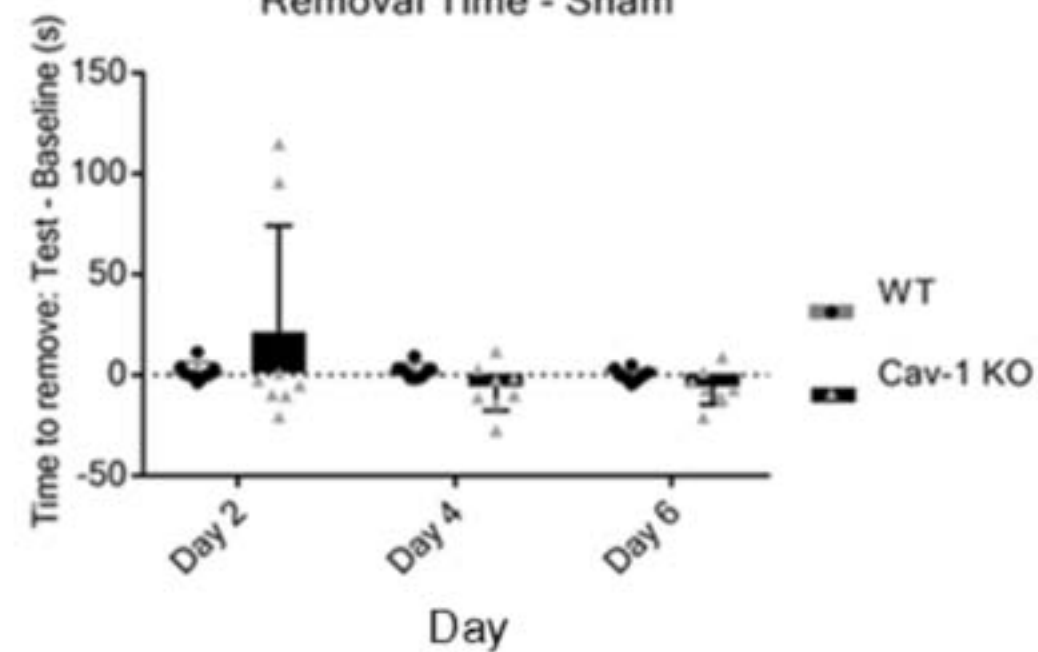

# Neuroscore after tMCAO

n=9 n=12

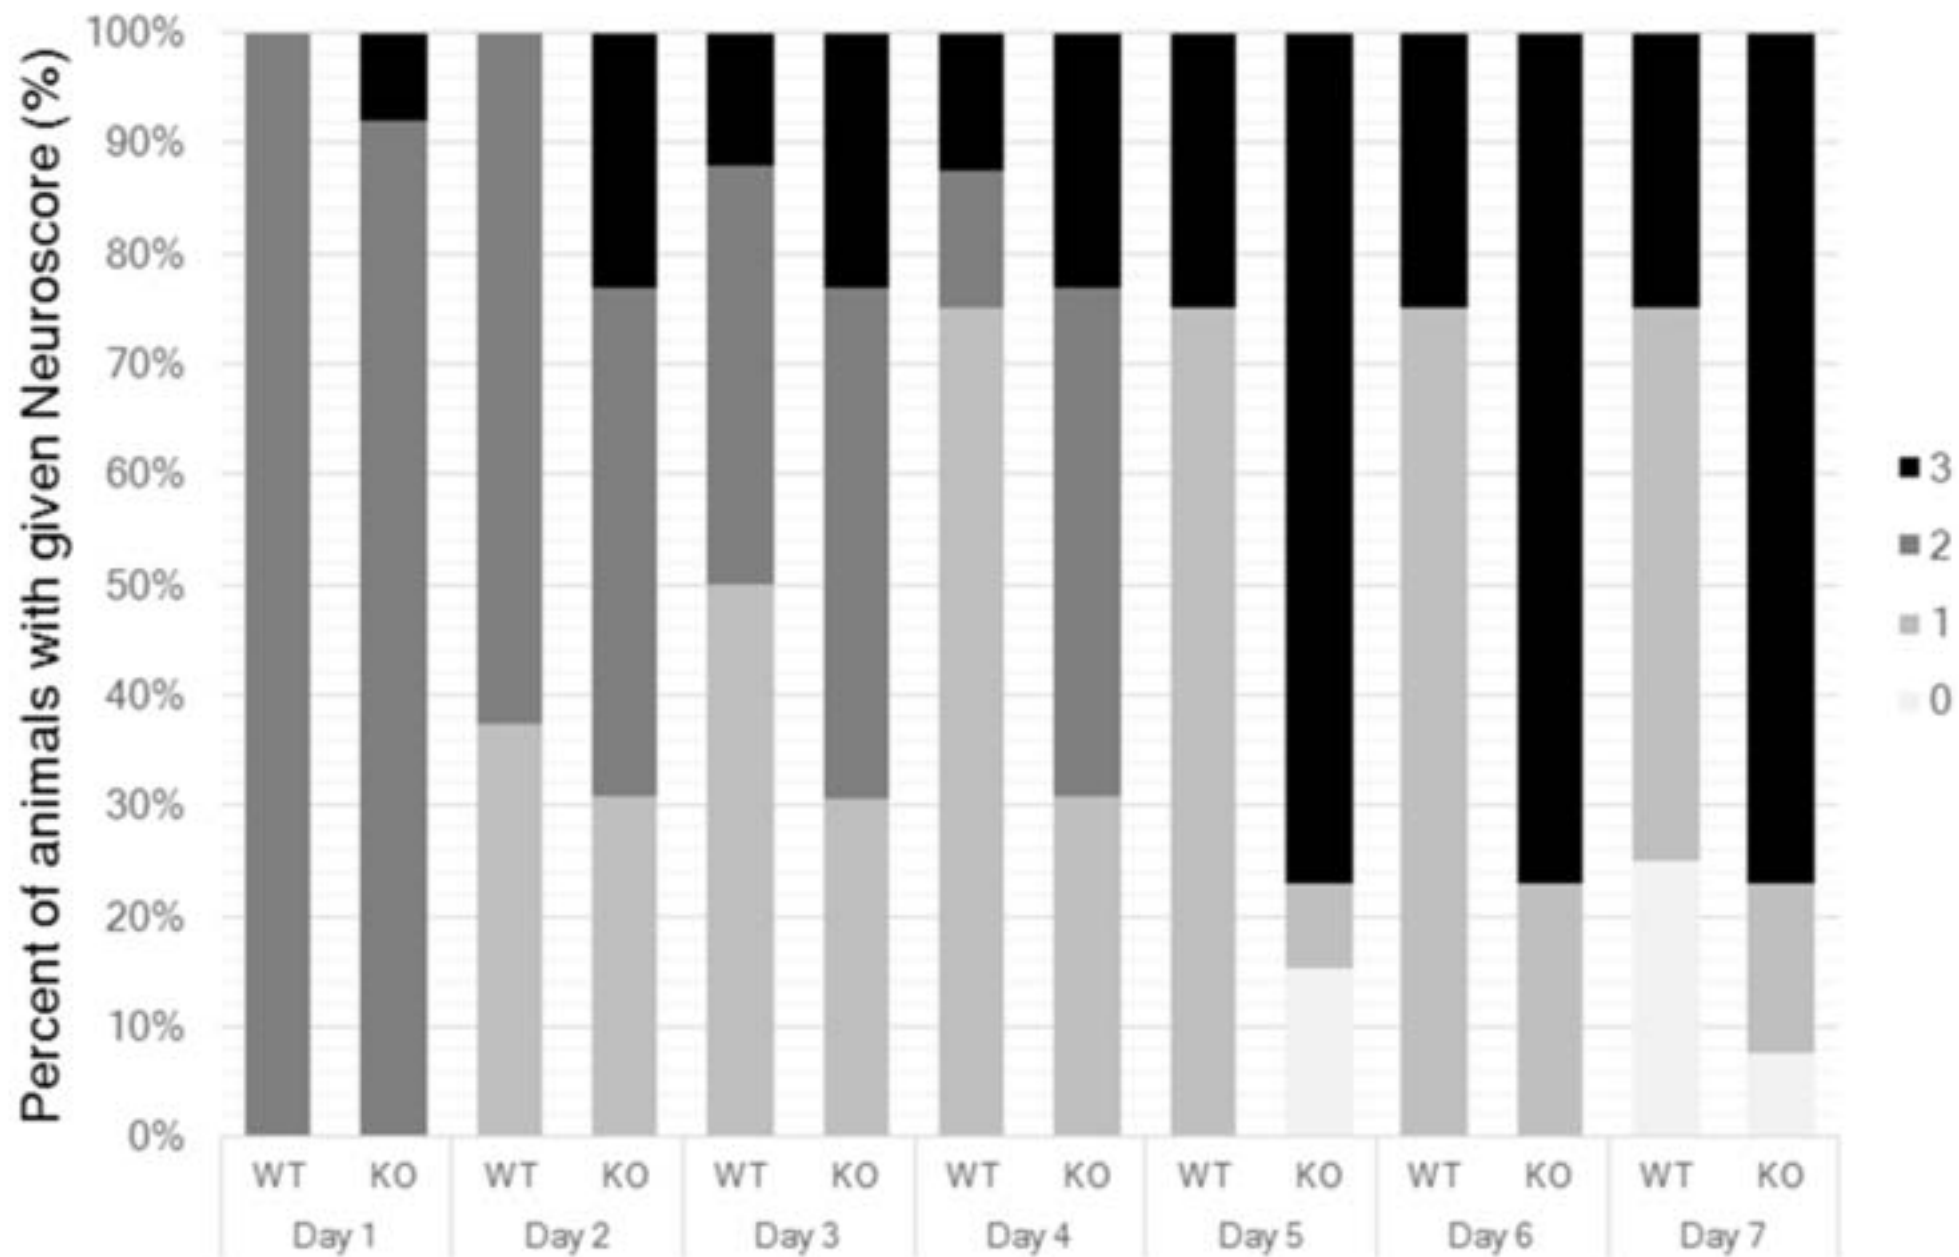

WT

Ki67

GFAP

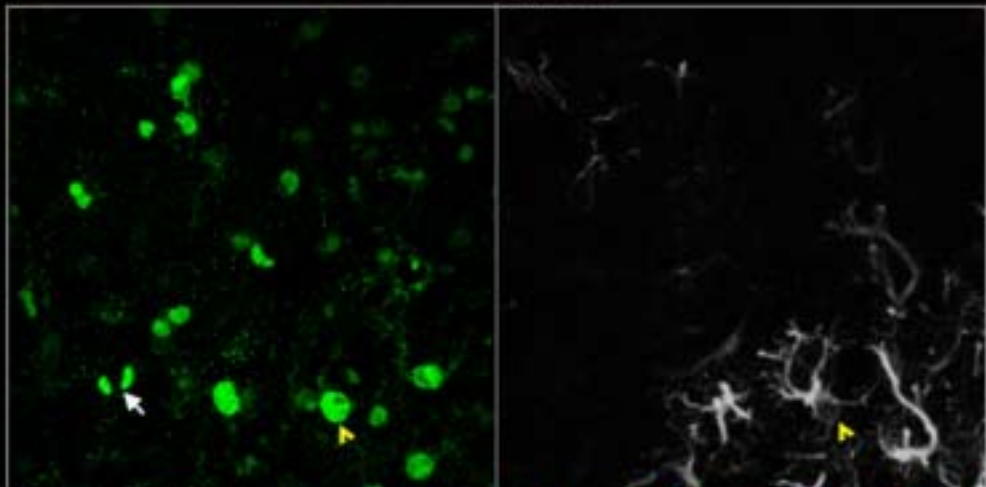

Cav-1 KO

Ki67

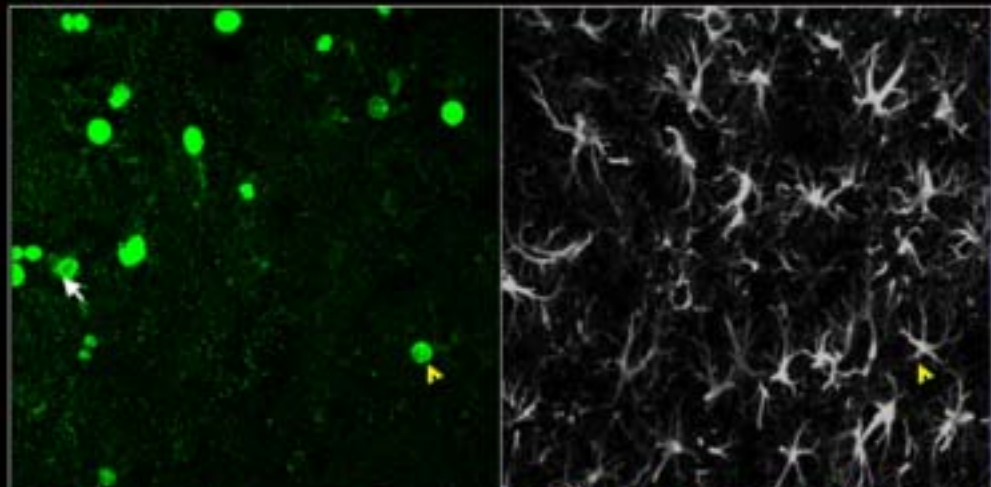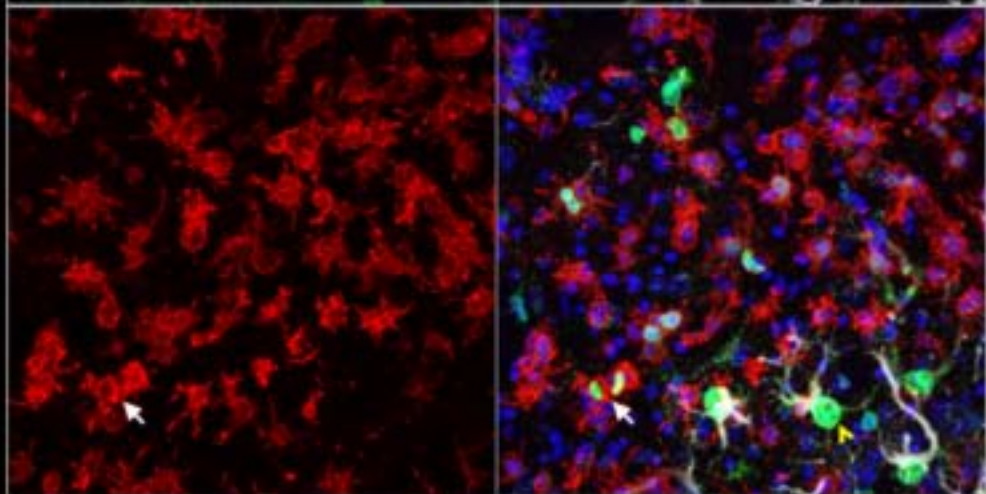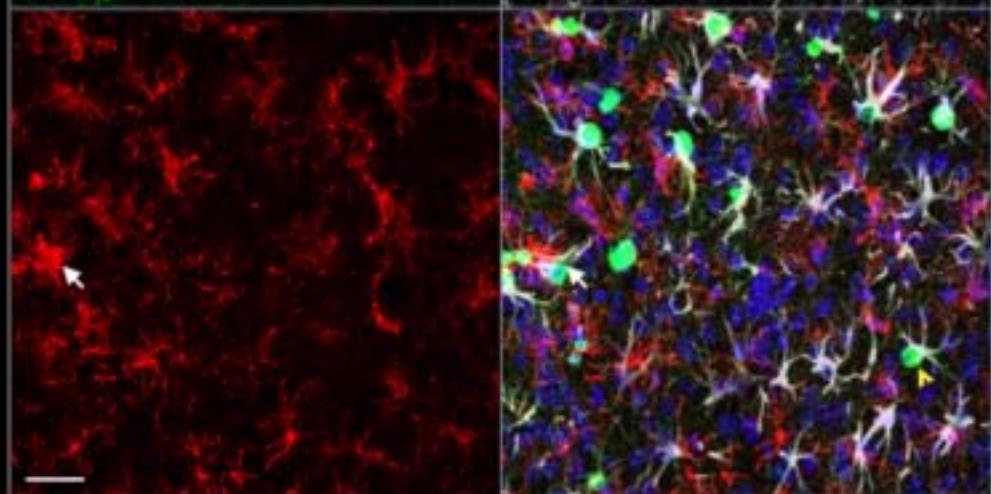

Iba1

Merge + DAPI
